# Supplementary material for: The thionophosphate–thiolophosphate † photoisomerization proceeds predominantly through a non-chain radical pathway. Synthetically viable benzylation of tetrahydrofuran, propan-2-ol and olefins ‡
Source: Royal Society of Chemistry journal article supplement (doi:10.1039/b003501g), 2001-01-01

Date : Fri Oct 13 15:29:11 2000

FileName : EN703-1-1H.nmdata  
Comment : EN703-1-1H  
SliceHistory :  
EXMODE : non

POINT : 32768 points  
SAMPO : 32768 points  
FREQU : 7993.6 Hz  
FILTR : 4000 Hz  
DELAY : 50.0 usec  
DEADT : 71.8 usec  
INTVL : 125.1 usec  
TIMES : 12 times  
DUMMY : 1 times  
PD : 2.9007 sec  
ACQTM : 4099.2769 msec  
PREDL : 10.0000 msec  
INIWT : 1000.0000 msec  
RESOL : 0.24 Hz  
PW1 : 6.35 usec  
OBNUC : 1H  
OBFRQ : 399.65 MHz  
OBSET : 134300.00 Hz  
RGAIN : 22

SCANS : 12 times  
SLVNT : CDCL3  
SPINNING : 14 Hz  
TEMP : 25.5 C

7.4462  
7.4285  
7.3504  
7.3333  
7.3144  
7.2985  
7.2815  
7.2601

5.2111

3.6545

1.5615  
1.4797  
1.4059  
1.2338  
1.1966  
1.1356  
1.1038  
1.0739  
0.7170

0.0000

1.94

0.30

1.00

6.29

0.92

1.02

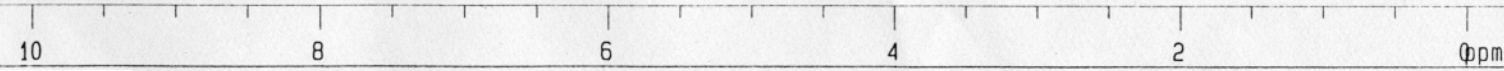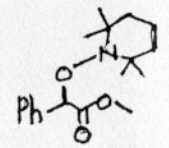

Supplement: b003501g1.pdf [file b003501g1.pdf]
