# Supplementary material for: The thionophosphate–thiolophosphate † photoisomerization proceeds predominantly through a non-chain radical pathway. Synthetically viable benzylation of tetrahydrofuran, propan-2-ol and olefins ‡
Source: Royal Society of Chemistry journal article supplement (doi:10.1039/b003501g), 2001-01-01

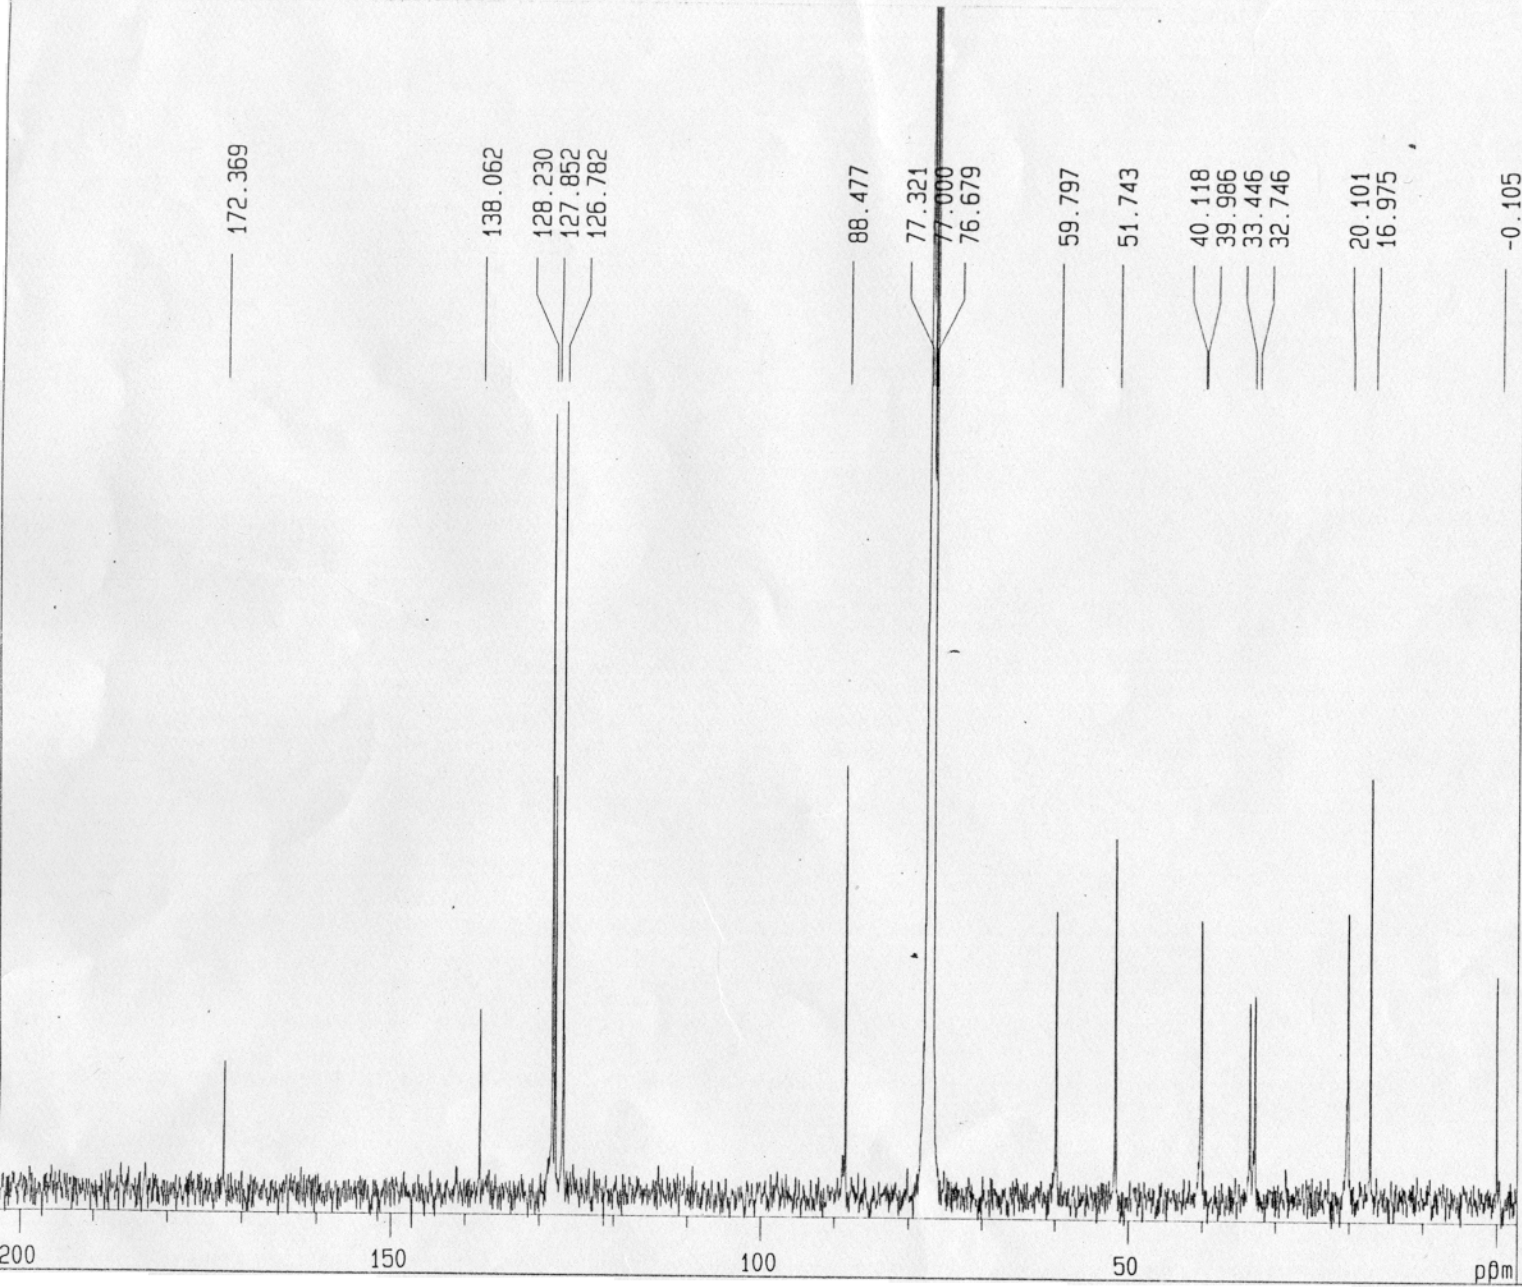

172.369

138.062

128.230

127.852

126.782

88.477

77.321

77.000

76.679

59.797

51.743

40.118

39.986

33.446

32.746

20.101

16.975

-0.105

Date : Tue Oct 17 13:45:17 2000

FileName : EN703-1-C.nmdata  
 Comment : EN703-1-13C  
 SliceHistory :  
 EXMODE : bcm

POINT : 32768 points  
 SAMPO : 32768 points  
 FREQU : 27100.3 Hz  
 FILTR : 13550 Hz  
 DELAY : 14.8 usec  
 DEADT : 19.5 usec  
 INTVL : 36.9 usec  
 TIMES : 3000 times  
 DUMMY : 1 times  
 PD : 1.7909 sec  
 ACQTM : 1209.1393 msec  
 PREDL : 10.00000 msec  
 INIWT : 1000.0000 msec  
 RESOL : 0.83 Hz  
 PW1 : 5.20 usec  
 OBNUC : 13C  
 OBFREQ : 100.40 MHz  
 OBSET : 135500.00 Hz  
 RGAIN : 27  
 IRNUC : 1H  
 IRFREQ : 399.65 MHz  
 IRSET : 134300.00 Hz  
 IRRPW : 50.0 usec  
 IRRNS : 0

SCANS : 2701 times

SLVNT : CDCL3  
 SPINNING : 13 Hz  
 TEMP : 25.1 C

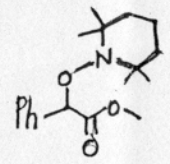

Supplement: b003501g3.pdf [file b003501g3.pdf]
